# Supplementary material
Source: PubMed Central journal article supplement (PMC153065)

D

kDa

114 —

81 —

IDE

+/+

-/-

+/+

-/-

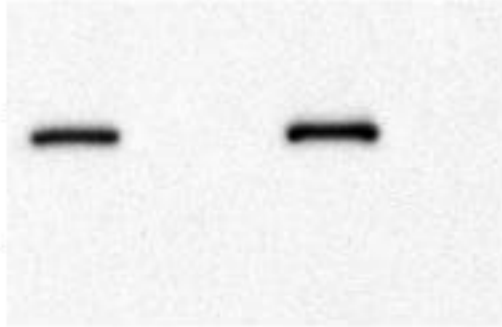

Supplement: pnas_0230450100_3.pdf [file pnas_0230450100_3.pdf]
